# Supplementary material for: Amplification of the Gene for Isoleucyl–tRNA Synthetase Facilitates Adaptation to the Fitness Cost of Mupirocin Resistance inSalmonella enterica
Source: Oxford University Press journal article supplement (doi:10.1534/genetics.109.113514), 2010-02-23
Supplement: 113514_si.pdf [file 113514_si.pdf]

# GENETICS

Supporting Information

<http://www.genetics.org/cgi/content/full/genetics.109.113514/DC1>

**Amplification of the Gene for Isoleucyl-tRNA Synthetase Facilitates  
Adaptation to the Fitness Cost of Mupirocin Resistance  
in *Salmonella enterica***

Wilhelm Paulander, Dan I. Andersson and Sophie Maisnier-Patin

Copyright © 2010 by the Genetics Society of America  
DOI: 10.1534/genetics.109.113514

**TABLE S1****Strains used in the study**

| Designation                  |               | Relevant characteristics                                                                                 | Reference                                      |
|------------------------------|---------------|----------------------------------------------------------------------------------------------------------|------------------------------------------------|
| In the lab strain collection | In this study |                                                                                                          |                                                |
| JB124                        | WT            | Wild-type                                                                                                | Lab collection                                 |
| JB1853                       | R1            | IleRS (H594Y, <u>C</u> AC1780 -> <u>T</u> AC)                                                            | (PAULANDER <i>et al.</i> 2007a)                |
| JB1855                       | R2            | IleRS (F596L, <u>TTC</u> 1788 -> <u>TTG</u> )                                                            | “                                              |
| JB1850                       | R3            | IleRS (WV631L, <u>TGGGTG</u> 1889-1891 ->TTG)                                                            | “                                              |
| DA8947                       | C1            | Evolved from R1: IleRS (H594Y) and expression mutation C (-591)->A                                       | (PAULANDER <i>et al.</i> 2007a) and this study |
| DA11020                      | C2            | Evolved from R1: IleRS (H594Y) and expression mutation C (-1036)->T                                      | “                                              |
| DA11022                      | C3            | Evolved from R1: IleRS (H594Y) and 4-fold amplification of <i>ileS</i>                                   | “                                              |
| DA8992                       | C4            | Evolved from R2: IleRS (F596L) and expression mutation C (-577)->T                                       | “                                              |
| DA9162                       | C5            | Evolved from R2: IleRS (F596L) and expression mutation G (-22) ->T                                       | “                                              |
| DA8995                       | C6            | Evolved from R2: IleRS (F596L) and expression mutation C (-1036)->T                                      | “                                              |
| DA9163                       | C7            | Evolved from R2: IleRS (F596L) 2-fold amplification of <i>ileS</i> and expression mutation T (-421)->C   | “                                              |
| DA9167                       | C8            | Evolved from R2: IleRS (F596L) 2-fold amplification of <i>ileS</i> and expression mutation T (-405)->C   | “                                              |
| DA9171                       | C9            | Evolved from R2: IleRS (F596L) 2-fold amplification of <i>ileS</i> and expression mutation T (-405)->C   | “                                              |
| DA9169                       | C10           | Evolved from R2: IleRS (F596L) and 4-fold amplification of <i>ileS</i>                                   | “                                              |
| DA9150                       | C11           | Evolved from R3: IleRS (WV631L), 2-fold amplification of <i>ileS</i> and expression mutation C (-567)->T | “                                              |
| DA9155                       | C12           | Evolved from R3: IleRS (WV631L) and 6-fold amplification of <i>ileS</i>                                  | “                                              |
| DA13883                      | C12-1         | Evolved from C12: IleRS (WV631L) and 2-fold amplification of <i>ileS</i>                                 | This study                                     |
| DA13884                      | C12-3         | Evolved from C12: IleRS (WV631L, Q420H)                                                                  | “                                              |
| DA13867                      | C12-4         | Evolved from C12: IleRS (WV631L) and 2-fold amplification of <i>ileS</i>                                 | “                                              |
| DA13855                      | C12-5         | Evolved from C12: IleRS (WV631L, Q420H)                                                                  | “                                              |

|         |        |                                                                          |   |
|---------|--------|--------------------------------------------------------------------------|---|
| DA13885 | C12-6  | Evolved from C12: IleRS (WV631L) and 2-fold amplification of <i>ileS</i> | “ |
| DA13868 | C12-7  | Evolved from C12: IleRS (WV631L, Q420H)                                  | “ |
| DA13886 | C12-8  | Evolved from C12: IleRS (WV631L, P184T)                                  | “ |
| DA13856 | C12-9  | Evolved from C12: IleRS (WV631L) and 2-fold amplification of <i>ileS</i> | “ |
| DA13869 | C12-10 | Evolved from C12: IleRS (WV631L) and 2-fold amplification of <i>ileS</i> | “ |
| DA13887 | C12-11 | Evolved from C12: IleRS (WV631L) and 2-fold amplification of <i>ileS</i> | “ |
| DA13870 | C12-12 | Evolved from C12: IleRS (WV631L) and 2-fold amplification of <i>ileS</i> | “ |
| DA13871 | C12-13 | Evolved from C12: IleRS (WV631L) and 5-fold amplification of <i>ileS</i> | “ |
| DA13888 | C12-14 | Evolved from C12: IleRS (WV631L) and 3-fold amplification of <i>ileS</i> | “ |
| DA13874 | C12-16 | Evolved from C12: IleRS (WV631L) and 3-fold amplification of <i>ileS</i> | “ |
| DA13876 | C12-17 | Evolved from C12: IleRS (WV631L) and 2-fold amplification of <i>ileS</i> | “ |
| DA13872 | C12-18 | Evolved from C12: IleRS (WV631L) and 4-fold amplification of <i>ileS</i> | “ |

---

**TABLE S2****Primers**

| Name                     | Purpose              | Sequence (5' -3')           |
|--------------------------|----------------------|-----------------------------|
| <i>ileS</i> Forward      | PCR                  | GGTCAAAGGGGTCTATGC          |
| <i>ileS</i> Reverse      | PCR                  | CAACAAAGCCGTGCCACA          |
| <i>ileS</i> qPCR Forward | qPCR primer          | GCGAGCGTGAAAAATATGTCTTC     |
| <i>ileS</i> qPCR Reverse | qPCR primer          | CGTCATTAAATTCTTCATTCTCTTCCA |
| <i>recA</i> qPCR Forward | qPCR primer          | GCGGAAATCGGCGACTCT          |
| <i>recA</i> qPCR Reverse | qPCR primer          | CATACGGATCTGGTTGATGAAAATC   |
| Prom <i>ileS</i> Forward | Promoter cloning     | TGCGTTGTGCTTACGAGCCTTT      |
| Prom <i>ileS</i> Reverse | Promoter cloning     | CAGCATTCCCAGTTCACGCTT       |
| <i>ileS</i> (1)          | Sequencing           | AGCATTTCATATTGGTCACTCA      |
| <i>ileS</i> (2)          | Sequencing           | CTTCATTCTGCTGGGCGTGTT       |
| <i>ileS</i> (3)          | Sequencing           | ATCTGGTTGAAAGCGTCAT         |
| <i>ileS</i> (4)          | Sequencing           | CTGGCGCGATGGAAGAGGTG        |
| <i>ileS</i> (5)          | Sequencing           | TCCTGCTGGCGAACCTCAATG       |
| <i>ileS</i> (6)          | Sequencing           | GAACCT GGAAGCAAAGTGAC       |
| Prom <i>ileS</i> (1)     | Sequencing           | GGACGAGTGCCAATGTTTCGCTA     |
| Prom <i>ileS</i> (2)     | Sequencing           | CGCATGGCGATGAAAAGCATCT      |
| STM0036 Forward          | Probe a for Southern | ACATATCGCGATGACGCCGTGGTC    |
| STM0036 Reverse          | Probe a              | CGGTAGATAGTCTGGGCTCCCCAG    |
| caiT Forward             | Probe b              | GTAGCTACGCACATCGCTGGCGAT    |
| caiT Reverse             | Probe b              | TCACCAACGTCTGGGGTTGGGCAT    |
| STM0019 Forward          | Probe c              | CGGATGAGCGTACCGTCACGCT      |
| STM0019 Reverse          | Probe c              | TTATGGATCGGTAACGTCGCGT      |
| kefC Forward             | Probe d              | TATTGGCGTCGGCATGTGCGATT     |
| kefC Reverse             | Probe d              | ATGCGACTTCACCAGTTCACCTCAG   |
| talB Forward             | Probe e              | TGAAGCGTCTATCGCCAAAGCA      |
| talB Reverse             | Probe e              | TTCTTGGTCTACCGCAAACCTTACG   |
| sthB Forward             | Probe f              | TCCACGCCCGTTTCGTTATTCA      |
| sthB Reverse             | Probe f              | CACCGACCTGTGTTATCGCAA       |
| serB Forward             | Probe g              | TCCACGGCGATCCAAATTGAGT      |
| serB Reverse             | Probe g              | ATGCAAACACGCCCATCAGGT       |
| murD Forward             | Probe h              | TCGCGAATTGTACGTGCTGGAA      |
| murD Reverse             | Probe h              | ATCCAACGTACGCCGTTATGCT      |
| deoB Forward             | Probe i              | AAAACAGCTTCCCGCAGGAAC       |
| deoB Reverse             | Probe i              | GATGGTTTTATCGCCCGCTTCT      |
| dnaC Forward             | Probe j              | CGTTCGCCAAGCATTTCGTCA       |
| dnaC Reverse             | Probe j              | AAATGCAGCGCACCTTTAACCG      |
| recA Forward             | Probe recA           | ATCGGGCGTGGCATTCTGATTA      |
| recA Reverse             | Probe recA           | CGAAAGCGGAAATCGAAGGCGAAA    |

|      |                      |                        |
|------|----------------------|------------------------|
| CA5  | Joint Point mapping* | ATCGCCACCCTAATTAAACCCA |
| BD1  | Joint Point mapping  | TGGCTGAGACTATTCGTCAGCA |
| IC9B | Joint Point mapping  | GCCGACGCCATTGATAAAGCC  |
| IG1B | Joint Point mapping  | AGGCACCCATACCGATCACCA  |

---

\* Complete list of primers used for joint point mapping is available upon request.
