# Supplementary material for: Amplification of the Gene for Isoleucyl–tRNA Synthetase Facilitates Adaptation to the Fitness Cost of Mupirocin Resistance inSalmonella enterica
Source: Oxford University Press journal article supplement (doi:10.1534/genetics.109.113514), 2010-02-23
Supplement: tables1.pdf [file tables1.pdf]

**TABLE S1****Strains used in the study**

| Designation                  |               | Relevant characteristics                                                                                 | Reference                                      |
|------------------------------|---------------|----------------------------------------------------------------------------------------------------------|------------------------------------------------|
| In the lab strain collection | In this study |                                                                                                          |                                                |
| JB124                        | WT            | Wild-type                                                                                                | Lab collection                                 |
| JB1853                       | R1            | IleRS (H594Y, <u>C</u> AC1780 -> <u>T</u> AC)                                                            | (PAULANDER <i>et al.</i> 2007a)                |
| JB1855                       | R2            | IleRS (F596L, <u>TTC</u> 1788 -> <u>TTG</u> )                                                            | “                                              |
| JB1850                       | R3            | IleRS (WV631L, <u>TGGGTG</u> 1889-1891 ->TTG)                                                            | “                                              |
| DA8947                       | C1            | Evolved from R1: IleRS (H594Y) and expression mutation C (-591)->A                                       | (PAULANDER <i>et al.</i> 2007a) and this study |
| DA11020                      | C2            | Evolved from R1: IleRS (H594Y) and expression mutation C (-1036)->T                                      | “                                              |
| DA11022                      | C3            | Evolved from R1: IleRS (H594Y) and 4-fold amplification of <i>ileS</i>                                   | “                                              |
| DA8992                       | C4            | Evolved from R2: IleRS (F596L) and expression mutation C (-577)->T                                       | “                                              |
| DA9162                       | C5            | Evolved from R2: IleRS (F596L) and expression mutation G (-22) ->T                                       | “                                              |
| DA8995                       | C6            | Evolved from R2: IleRS (F596L) and expression mutation C (-1036)->T                                      | “                                              |
| DA9163                       | C7            | Evolved from R2: IleRS (F596L) 2-fold amplification of <i>ileS</i> and expression mutation T (-421)->C   | “                                              |
| DA9167                       | C8            | Evolved from R2: IleRS (F596L) 2-fold amplification of <i>ileS</i> and expression mutation T (-405)->C   | “                                              |
| DA9171                       | C9            | Evolved from R2: IleRS (F596L) 2-fold amplification of <i>ileS</i> and expression mutation T (-405)->C   | “                                              |
| DA9169                       | C10           | Evolved from R2: IleRS (F596L) and 4-fold amplification of <i>ileS</i>                                   | “                                              |
| DA9150                       | C11           | Evolved from R3: IleRS (WV631L), 2-fold amplification of <i>ileS</i> and expression mutation C (-567)->T | “                                              |
| DA9155                       | C12           | Evolved from R3: IleRS (WV631L) and 6-fold amplification of <i>ileS</i>                                  | “                                              |
| DA13883                      | C12-1         | Evolved from C12: IleRS (WV631L) and 2-fold amplification of <i>ileS</i>                                 | This study                                     |
| DA13884                      | C12-3         | Evolved from C12: IleRS (WV631L, Q420H)                                                                  | “                                              |
| DA13867                      | C12-4         | Evolved from C12: IleRS (WV631L) and 2-fold amplification of <i>ileS</i>                                 | “                                              |
| DA13855                      | C12-5         | Evolved from C12: IleRS (WV631L, Q420H)                                                                  | “                                              |

|         |        |                                                                          |   |
|---------|--------|--------------------------------------------------------------------------|---|
| DA13885 | C12-6  | Evolved from C12: IleRS (WV631L) and 2-fold amplification of <i>ileS</i> | “ |
| DA13868 | C12-7  | Evolved from C12: IleRS (WV631L, Q420H)                                  | “ |
| DA13886 | C12-8  | Evolved from C12: IleRS (WV631L, P184T)                                  | “ |
| DA13856 | C12-9  | Evolved from C12: IleRS (WV631L) and 2-fold amplification of <i>ileS</i> | “ |
| DA13869 | C12-10 | Evolved from C12: IleRS (WV631L) and 2-fold amplification of <i>ileS</i> | “ |
| DA13887 | C12-11 | Evolved from C12: IleRS (WV631L) and 2-fold amplification of <i>ileS</i> | “ |
| DA13870 | C12-12 | Evolved from C12: IleRS (WV631L) and 2-fold amplification of <i>ileS</i> | “ |
| DA13871 | C12-13 | Evolved from C12: IleRS (WV631L) and 5-fold amplification of <i>ileS</i> | “ |
| DA13888 | C12-14 | Evolved from C12: IleRS (WV631L) and 3-fold amplification of <i>ileS</i> | “ |
| DA13874 | C12-16 | Evolved from C12: IleRS (WV631L) and 3-fold amplification of <i>ileS</i> | “ |
| DA13876 | C12-17 | Evolved from C12: IleRS (WV631L) and 2-fold amplification of <i>ileS</i> | “ |
| DA13872 | C12-18 | Evolved from C12: IleRS (WV631L) and 4-fold amplification of <i>ileS</i> | “ |

---
