# Supplementary material for: Amplification of the Gene for Isoleucyl–tRNA Synthetase Facilitates Adaptation to the Fitness Cost of Mupirocin Resistance inSalmonella enterica
Source: Oxford University Press journal article supplement (doi:10.1534/genetics.109.113514), 2010-02-23
Supplement: tables2.pdf [file tables2.pdf]

**TABLE S2****Primers**

| Name                     | Purpose              | Sequence (5' -3')           |
|--------------------------|----------------------|-----------------------------|
| <i>ileS</i> Forward      | PCR                  | GGTCAAAGGGGTCTATGC          |
| <i>ileS</i> Reverse      | PCR                  | CAACAAAGCCGTGCCACA          |
| <i>ileS</i> qPCR Forward | qPCR primer          | GCGAGCGTGAAAAATATGTCTTC     |
| <i>ileS</i> qPCR Reverse | qPCR primer          | CGTCATTAAATTCTTCATTCTCTTCCA |
| <i>recA</i> qPCR Forward | qPCR primer          | GCGGAAATCGGCGACTCT          |
| <i>recA</i> qPCR Reverse | qPCR primer          | CATACGGATCTGGTTGATGAAAATC   |
| Prom <i>ileS</i> Forward | Promoter cloning     | TGCGTTGTGCTTACGAGCCTTT      |
| Prom <i>ileS</i> Reverse | Promoter cloning     | CAGCATTCCCAGTTCACGCTT       |
| <i>ileS</i> (1)          | Sequencing           | AGCATTTCATATTGGTCACTCA      |
| <i>ileS</i> (2)          | Sequencing           | CTTCATTCTGCTGGGCGTGTT       |
| <i>ileS</i> (3)          | Sequencing           | ATCTGGTTGAAAGCGTCAT         |
| <i>ileS</i> (4)          | Sequencing           | CTGGCGCGATGGAAGAGGTG        |
| <i>ileS</i> (5)          | Sequencing           | TCCTGCTGGCGAACCTCAATG       |
| <i>ileS</i> (6)          | Sequencing           | GAACCT GGAAGCAAAGTGAC       |
| Prom <i>ileS</i> (1)     | Sequencing           | GGACGAGTGCCAATGTTTCGCTA     |
| Prom <i>ileS</i> (2)     | Sequencing           | CGCATGGCGATGAAAAGCATCT      |
| STM0036 Forward          | Probe a for Southern | ACATATCGCGATGACGCCGTGGTC    |
| STM0036 Reverse          | Probe a              | CGGTAGATAGTCTGGGCTCCCCAG    |
| caiT Forward             | Probe b              | GTAGCTACGCACATCGCTGGCGAT    |
| caiT Reverse             | Probe b              | TCACCAACGTCTGGGGTTGGGCAT    |
| STM0019 Forward          | Probe c              | CGGATGAGCGTACCGTCACGCT      |
| STM0019 Reverse          | Probe c              | TTATGGATCGGTAACGTCGCGT      |
| kefC Forward             | Probe d              | TATTGGCGTCGGCATGTGCGATT     |
| kefC Reverse             | Probe d              | ATGCGACTTCACCAGTTCACTCAG    |
| talB Forward             | Probe e              | TGAAGCGTCTATCGCCAAAGCA      |
| talB Reverse             | Probe e              | TTCTTGGTCTACCGCAAACCTTACG   |
| sthB Forward             | Probe f              | TCCACGCCCGTTTCGTTATTCA      |
| sthB Reverse             | Probe f              | CACCGACCTGTGTTATCGCAA       |
| serB Forward             | Probe g              | TCCACGGCGATCCAAATTGAGT      |
| serB Reverse             | Probe g              | ATGCAAACACGCCCATCAGGT       |
| murD Forward             | Probe h              | TCGCGAATTGTACGTGCTGGAA      |
| murD Reverse             | Probe h              | ATCCAACGTACGCCGTTATGCT      |
| deoB Forward             | Probe i              | AAAACAGCTTCCCGCAGGAAC       |
| deoB Reverse             | Probe i              | GATGGTTTTATCGCCCGCTTCT      |
| dnaC Forward             | Probe j              | CGTTCGCCAAGCATTTCGTCA       |
| dnaC Reverse             | Probe j              | AAATGCAGCGCACCTTTAACCG      |
| recA Forward             | Probe recA           | ATCGGGCGTGGCATTCTGATTA      |
| recA Reverse             | Probe recA           | CGAAAGCGGAAATCGAAGGCGAAA    |

|      |                      |                        |
|------|----------------------|------------------------|
| CA5  | Joint Point mapping* | ATCGCCACCCTAATTAAACCCA |
| BD1  | Joint Point mapping  | TGGCTGAGACTATTCGTCAGCA |
| IC9B | Joint Point mapping  | GCCGACGCCATTGATAAAGCC  |
| IG1B | Joint Point mapping  | AGGCACCCATACCGATCACCA  |

---

\* Complete list of primers used for joint point mapping is available upon request.
